# Supplementary material for: Cytokine Receptor-like Factor 1 (CRLF1) and Its Role in Osteochondral Repair
Source: MDPI journal article supplement (doi:10.3390/cells13090757), 2024-04-28
Supplement: s1 [file s1]

**Table S1.** Sequences of Primers used for qPCR.

| Gene     |         | Primers (5' to 3')        |
|----------|---------|---------------------------|
| Aggrecan | Forward | TGCGGGTCAACAGTGCCTATC     |
|          | Reverse | CACGATGCCTTTCACACGAC      |
| CLC      | Forward | CCATGGACCTCCGAGCAG        |
|          | Reverse | GTCCCCTGTGCGATTGAGAG      |
| CRLF1    | Forward | ATGAAGGACTTGACCTGCCG      |
|          | Reverse | TGTGTTGTCCTGGCCATACC      |
| IL-6     | Forward | AGACAGCCACTCACCTCTTCAG    |
|          | Reverse | TTCTGCCAGTGCCTCTTTGCTG    |
| Sox-9    | Forward | ACACACAGCTCACTCGACCTTG    |
|          | Reverse | AGGGAATTCTGGTTGCTCCTCT    |
| COL2A1   | Forward | TTCAGCTATGGAGATGACAATC    |
|          | Reverse | AGAGTCCTAGAGTGA CTGAG     |
| COL10A1  | Forward | CCCTCTTGTTAGTGCCAACC      |
|          | Reverse | AGATTCCAGTCCTTGGGTCA      |
| MMP-13   | Forward | GACTGGTAATGGCATCAAGGGA    |
|          | Reverse | CACCGGCAAAAGCCACTTTA      |
| 18S      | Forward | ACGAGACTCTGGCATGCTAACTAGT |
|          | Reverse | CGCCACTTGTTCTCTAAGAA      |
| RPL13    | Forward | TCGTACGCTGTGAAGGCATC      |
|          | Reverse | GGTTGGTGTTCATCCGCTTG      |

**Table S2.** Eight histological and immunohistological parameters selected for quantification of Cartilage Repair as per International Cartilage Repair Society II Scoring System with Slight Modifications.

| Parameters                           | Score for Different Attributes of Parameters (total Max Score 19) |                        |                              |                           |
|--------------------------------------|-------------------------------------------------------------------|------------------------|------------------------------|---------------------------|
|                                      | 3                                                                 | 2                      | 1                            | 0                         |
| Tissue Morphology                    | Hyaline                                                           | Mostly hyaline         | Mixed hyaline/fibrocartilage | Fibrous tissue            |
| Matrix Staining (Safranin O)         | —                                                                 | Normal Intensity       | Reduced Intensity            | No staining               |
| Cell Distribution                    | —                                                                 | Columnar               | Columnar and Clusters        | Clusters and disorganized |
| Surface Architecture                 | —                                                                 | Smooth (>3/4)          | Moderate (>1/2-3/4)          | Severely irregular (<1/4) |
| Integration with subjacent bone      | —                                                                 | Full basal integration | Partial basal integration    | No basal integration      |
| Integration with subjacent cartilage | —                                                                 | Full integration       | Partial integration          | No integration            |
| Type I collagen immunostaining       | None                                                              | Slight                 | Moderate                     | Abundant                  |
| Type II Collagen Immunostaining      | Abundant                                                          | Moderate               | Slight                       | None                      |
